# Supplementary material
Source: Springer Nature journal article supplement (https://www.springermedizin.de/resource/supplementary/13075_2009_2770_MOESM9_ESM.pdf/9692850)

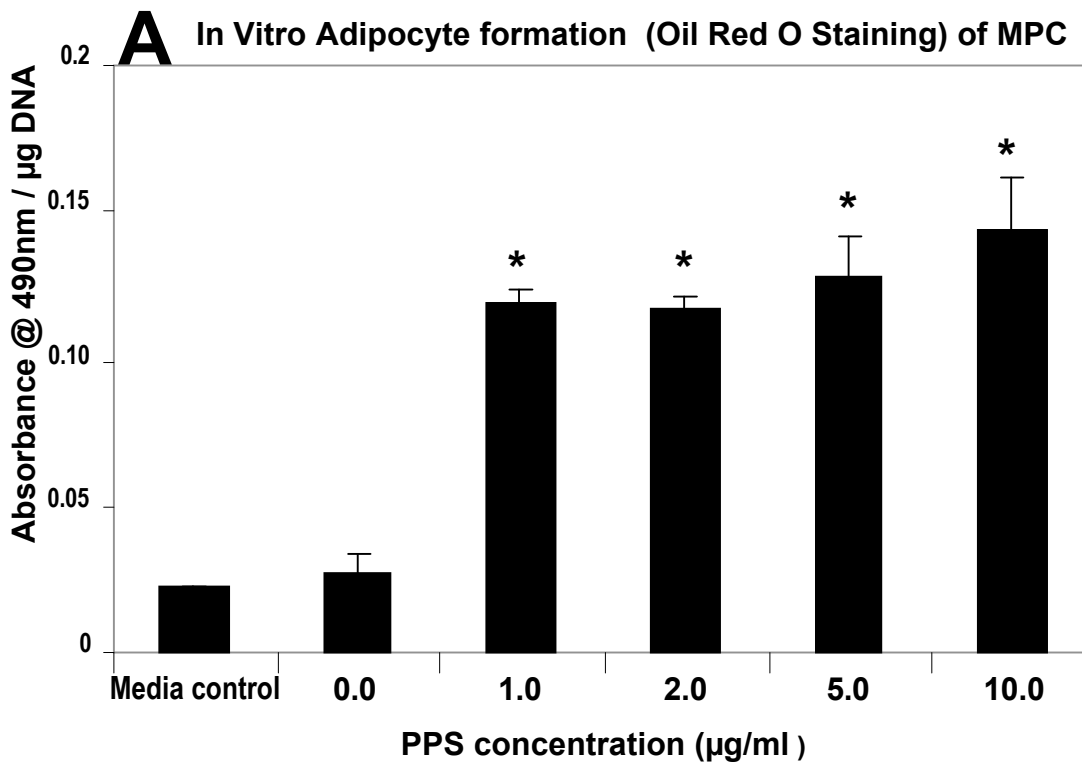

**B** Photomicrographs of Adipogenic Cultures

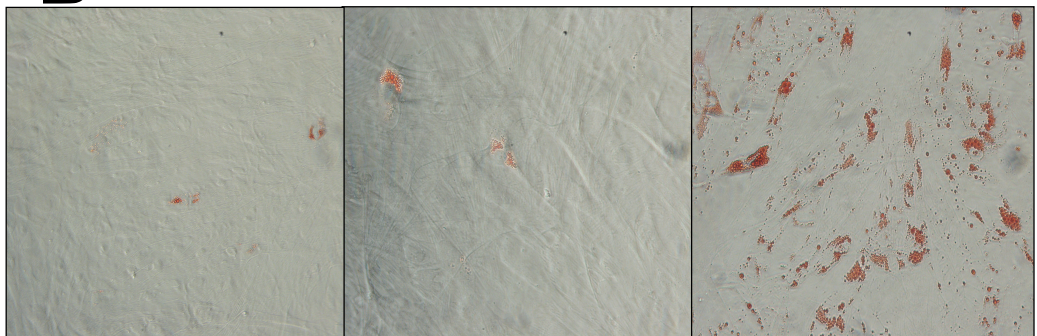

Normal Media

0.0 µg/ml PPS

10 µg/ml PPS

Supplement: MOESM9 [file 9692850]
